# Supplementary material for: Sugar-modified silanes: precursors for silica monoliths
Source: Royal Society of Chemistry journal article supplement (doi:10.1039/b401278j), 2004-01-01
Supplement: b401278j.pdf [file b401278j.pdf]

## Sugar-Modified Silanes: Precursors for Silica Monoliths

Michael A. Brook,\* Yang Chen, Kui Guo, Zheng Zhang and John D. Brennan

Department of Chemistry, McMaster University, 1280 Main St. W., Hamilton ON Canada L8S 4M1.

mabrook@mcmaster.ca

### Supplementary Material

#### Syntheses

**CH<sub>2</sub>=CHCH<sub>2</sub>(CH<sub>2</sub>CH<sub>2</sub>O)<sub>n</sub>CH<sub>2</sub>CH=CH<sub>2</sub>, ATPEO600:** To a solution of poly(ethylene glycol) (average MW 600, 6.0 g, *ca.* 10 mmol) in THF (100 mL) at 0 °C was added NaH (0.50 g, 20.8 mmol) slowly over 15 min. The mixture was allowed to warm up to room temperature and stirred for 5 h. The mixture was cooled down to 0 °C, allyl bromide (2.42 g, 20.0 mmol) was added. The mixture was warmed up to 40 °C and stirred for further 3 h. White precipitate was filtered off and washed with THF (3×10 mL). Combined filtrate and washing solution, THF was evaporated to give pale yellow crude product. The crude product was purified by chromatography (SiO<sub>2</sub>, 10% ethyl acetate in hexane as eluent) give allyl terminated poly(ethylene glycol), **ATPEO600** as colorless oil, 6.1 g, (*ca.* 90% yield). <sup>1</sup>H NMR (200.2 MHz, CDCl<sub>3</sub>): δ 3.54-3.65 (m, 44H, PEO's OCH<sub>2</sub>), 3.97 (dd, 2H, J=5.6Hz, J=1.1Hz CH<sub>2</sub>=CHCH<sub>2</sub>O), 3.98 (dd, 2H, J=5.6Hz, J=1.1Hz CH<sub>2</sub>=CHCH<sub>2</sub>O), 5.19 (m, 4H, CH<sub>2</sub>=CHCH<sub>2</sub>O), 5.88 (m, 2H, CH<sub>2</sub>=CHCH<sub>2</sub>O) ppm. <sup>13</sup>C NMR (50.3 MHz, CDCl<sub>3</sub>): δ 69.4, 70.5 (PEO's OCH<sub>2</sub>), 72.2 (CH<sub>2</sub>=CHCH<sub>2</sub>O), 117.1 (CH<sub>2</sub>=CHCH<sub>2</sub>O), 134.7 (CH<sub>2</sub>=CHCH<sub>2</sub>O) ppm. MS(maldi), *m/z*, 693 (5, M+Na<sup>+</sup>, n=13), 671(4, M+1, n=13), 649 (8, M+Na<sup>+</sup>, n=12), 627 (6, M+1, n=12), 605(12, M+Na<sup>+</sup>, n=11), 583(6, M+1, n=11), 561(9, M+Na<sup>+</sup>, n=10), 539 (5, M+1, n=10), 517(7, M+Na<sup>+</sup>, n=9), 495(5, M+1, n=9), 473(6, M+Na<sup>+</sup>, n=8), 42.1(100).

**CH<sub>2</sub>=CHCH<sub>2</sub>(CH<sub>2</sub>CH<sub>2</sub>O)<sub>n</sub>CH<sub>2</sub>CH=CH<sub>2</sub>, ATPEO2000:** To a solution of poly(ethylene glycol) (average MW 2000, 2.0 g, *ca.* 1 mmol) in THF (20 mL) at room temperature was added NaH (0.050 g, 2.1 mmol). The mixture was stirred at 50 °C for 2 h. Allyl bromide (0.24 g, 2.0 mmol) was added. The mixture was stirred at room temperature for further 10 h. White precipitate was filtered off and washed with THF (3×10 mL). Combined filtrate and washing solution, THF was evaporated to give pale brown crude product. The crude product was purified by chromatography (SiO<sub>2</sub>, CH<sub>2</sub>Cl<sub>2</sub> as eluent) give allyl terminated poly(ethylene glycol), **ATPEO2000** as white solid, 1.89 g, (*ca.* 91% yield). <sup>1</sup>H NMR (200.2 MHz, CDCl<sub>3</sub>): δ 3.50-3.65 (m, 180H, PEO's OCH<sub>2</sub>), 3.97 (dd, 2H, J=5.6Hz, J=1.3Hz CH<sub>2</sub>=CHCH<sub>2</sub>O), 3.98 (dd, 2H, J=5.6Hz, J=1.3Hz CH<sub>2</sub>=CHCH<sub>2</sub>O), 5.16 (m, 4H, CH<sub>2</sub>=CHCH<sub>2</sub>O), 5.83 (m, 2H, CH<sub>2</sub>=CHCH<sub>2</sub>O) ppm. <sup>13</sup>C NMR (50.3 MHz, CDCl<sub>3</sub>): δ 69.2, 70.3 (PEO's OCH<sub>2</sub>), 72.2 (CH<sub>2</sub>=CHCH<sub>2</sub>O), 116.9 (CH<sub>2</sub>=CHCH<sub>2</sub>O), 134.5(CH<sub>2</sub>=CHCH<sub>2</sub>O) ppm.

**CH<sub>2</sub>=CHCH<sub>2</sub>(CH<sub>2</sub>CH<sub>2</sub>O)<sub>n</sub>CH<sub>2</sub>CH=CH<sub>2</sub>, ATPEO10K:** To a solution of poly(ethylene glycol) (average MW 10K, 10 g, *ca.* 1 mmol) in THF (100 mL) at room temperature was added NaH (0.050 g, 2.1 mmol). The mixture was stirred at 50 °C for 2 h. Allyl bromide (0.24 g, 2.0 mmol) was added. The mixture was stirred at room temperature for further 10 h. White precipitate was filtered off and washed with THF (3×20 mL). Combined filtrate and washing solution, THF was evaporated to give pale brown crude product. The crude product was dissolved in dichloromethane (20 mL), added to large amount of diethyl ether to give white precipitate. Repeated precipitate procedure once more gave allyl terminated poly(ethylene glycol), **ATPEO10K** as white solid, 7.9 g, (*ca.* 77% yield). <sup>1</sup>H NMR (200.2 MHz, CDCl<sub>3</sub>): δ 3.48-3.70 (m, 900H, PEO's OCH<sub>2</sub>), 3.96 (m, 4H, CH<sub>2</sub>=CHCH<sub>2</sub>O), 5.18 (m, 4H, CH<sub>2</sub>=CHCH<sub>2</sub>O), 5.84 (m, 2H, CH<sub>2</sub>=CHCH<sub>2</sub>O) ppm. <sup>13</sup>C NMR (50.3 MHz, CDCl<sub>3</sub>): δ 69.2-70.4 (PEO's OCH<sub>2</sub>), 72.1 (CH<sub>2</sub>=CHCH<sub>2</sub>O), 116.9 (CH<sub>2</sub>=CHCH<sub>2</sub>O), 134.6(CH<sub>2</sub>=CHCH<sub>2</sub>O) ppm.

**(EtO)<sub>3</sub>Si(CH<sub>2</sub>)<sub>3</sub>O(CH<sub>2</sub>CH<sub>2</sub>O)<sub>n</sub>(CH<sub>2</sub>)<sub>3</sub>Si(EtO)<sub>3</sub>, TESiPEO600:** To a mixture of ATPEO600 (2.1 g, *ca.* 3 mmol) and triethoxysilane (1.2 g, 6.9 mmol) one drop of Karsted's Pt catalyst was added. The mixture was stirred at room temperature for 1h (the reaction was monitored by <sup>1</sup>H NMR). The volatile organics was removed at 110 °C under vacuum. The residue was diluted with CH<sub>2</sub>Cl<sub>2</sub> (50 mL), activated charcoal (0.5 g) was added, the mixture was stirred at room temperature overnight. Filtered of charcoal, CH<sub>2</sub>Cl<sub>2</sub> was evaporated off to give TESiPEO600 as colorless oil, 2.45g, *ca.* 80%yield. FTIR(neat), *v* (cm<sup>-1</sup>) 2975s, 2928s, 2884s, 2741w, 1741w, 1631w, 1459m, 1445m, 1391m, 1352w, 1297w, 1257w, 1107s, 1083s, 959m, 794m, 699w; <sup>1</sup>H NMR (200.2 MHz, CDCl<sub>3</sub>): δ 0.61 (m, 4H, SiCH<sub>2</sub>), 1.20 (t, 18H, J=7.1 Hz, SiOCH<sub>2</sub>CH<sub>3</sub>), 1.64(m, 4H, SiCH<sub>2</sub>CH<sub>2</sub>CH<sub>2</sub>), 3.41(m, 4H, SiCH<sub>2</sub>CH<sub>2</sub>CH<sub>2</sub>), 3.57-3.63 (m, 56H, PEO's OCH<sub>2</sub>), 3.80 (dd, 4H, J=7.1Hz, J=14.0Hz, SiOCH<sub>2</sub>CH<sub>3</sub>) ppm. <sup>13</sup>C NMR (50.3 MHz, CDCl<sub>3</sub>): δ 6.5(SiCH<sub>2</sub>), 18.4(SiOCH<sub>2</sub>CH<sub>3</sub>), 23.0(SiCH<sub>2</sub>CH<sub>2</sub>CH<sub>2</sub>), 58.5(SiOCH<sub>2</sub>CH<sub>3</sub>), 70.1, 70.7 (PEO's OCH<sub>2</sub>), 73.8 (SiCH<sub>2</sub>CH<sub>2</sub>CH<sub>2</sub>) ppm.

**(EtO)<sub>3</sub>Si(CH<sub>2</sub>)<sub>3</sub>O(CH<sub>2</sub>CH<sub>2</sub>O)<sub>n</sub>(CH<sub>2</sub>)<sub>3</sub>Si(EtO)<sub>3</sub>, TESiPEO2000:** To a mixture of ATPEO2000 (2.0g, *ca.* 1 mmol) and triethoxysilane (0.36g, 2.2 mmol) in dichloromethane (20 mL) one drop of Karsted's Pt catalyst was added. The mixture was stirred under refluxing for 3h (the reaction was monitored by <sup>1</sup>H NMR). The solvent was evaporated and thereafter the volatile organics was removed at 110 °C under vacuum. The residue was diluted with CH<sub>2</sub>Cl<sub>2</sub> (50 mL), activated charcoal (0.5 g) was added, the mixture was stirred at room temperature overnight. Filtered of charcoal, CH<sub>2</sub>Cl<sub>2</sub> solution was concentrated and thereafter added to large amount of diethyl ether to give TESiPEO2000 as colorless solid, 2.1g, *ca.* 88%yield. FTIR(neat, KBr), *v* (cm<sup>-1</sup>) 2975s, 2929s, 2885s, 1633w, 1459m, 1391s, 1366w, 1296w, 1262w, 1257w, 1194m, 1167s, 1106s, 1082s, 959s, 794s, 698w <sup>1</sup>H NMR (200.2 MHz, CDCl<sub>3</sub>): δ 0.89 (m, 4H, SiCH<sub>2</sub>), 1.18 (t, 18H, J=7.1 Hz, SiOCH<sub>2</sub>CH<sub>3</sub>), 1.54(m, 4H, SiCH<sub>2</sub>CH<sub>2</sub>CH<sub>2</sub>), 2.65(m, 4H, SiCH<sub>2</sub>CH<sub>2</sub>CH<sub>2</sub>), 3.49-3.72 (m, 188H, PEO's OCH<sub>2</sub> and SiOCH<sub>2</sub>CH<sub>3</sub>, overlapped) ppm. <sup>13</sup>C NMR (50.3 MHz, CDCl<sub>3</sub>): δ 10.4(SiCH<sub>2</sub>), 18.1(SiOCH<sub>2</sub>CH<sub>3</sub>), 22.6(SiCH<sub>2</sub>CH<sub>2</sub>CH<sub>2</sub>), 58.1(SiOCH<sub>2</sub>CH<sub>3</sub>), 69.2-70.2, overlapped (PEO's OCH<sub>2</sub> and SiCH<sub>2</sub>CH<sub>2</sub>CH<sub>2</sub>) ppm.

**(EtO)<sub>3</sub>Si(CH<sub>2</sub>)<sub>3</sub>O(CH<sub>2</sub>CH<sub>2</sub>O)<sub>n</sub>(CH<sub>2</sub>)<sub>3</sub>Si(EtO)<sub>3</sub>, TESiPEO10K:** To a mixture of ATPEO10K (5 g, *ca.* 0.5 mmol) and triethoxysilane (0.18 g, 1.1 mmol) in dichloromethane (50 mL) one drop of Karsted's Pt catalyst was added. The mixture was stirred refluxing for 5h (the reaction was

## Supplementary material (ESI) for Journal of Materials Chemistry

This journal is © The Royal Society of Chemistry 2004

monitored by  $^1\text{H}$  NMR). The solvent was evaporated and thereafter the volatile organics was removed at  $110^\circ\text{C}$  under vacuum. The residue was diluted with  $\text{CH}_2\text{Cl}_2$  (100 mL), activated charcoal (1.0 g) was added, the mixture was stirred at room temperature overnight. Filtered of charcoal,  $\text{CH}_2\text{Cl}_2$  solution was concentrated and thereafter added to large amount of diethyl ether to precipitate white solid. Repeated precipitation procedure gave TESiPEO10K as white solid, 2.7g, ca. 50% yield. FTIR(neat, KBr),  $\nu$  ( $\text{cm}^{-1}$ ) 2974s, 2929s, 2885s, 1631w, 1454m, 1391s, 1364w, 1266w, 1257w, 1167s, 1082s, 959m, 794m, 698w;  $^1\text{H}$  NMR (200.2 MHz,  $\text{CDCl}_3$ ):  $\delta$  0.66 (m, 4H,  $\text{SiCH}_2$ ), 1.20 (m, 18H,  $\text{SiOCH}_2\text{CH}_3$ ), 1.56 (m, 4H,  $\text{SiCH}_2\text{CH}_2\text{CH}_2$ ), 2.65 (m, 4H,  $\text{SiCH}_2\text{CH}_2\text{CH}_2$ ), 3.20-3.90 (m, 910H, PEO's  $\text{OCH}_2$  and  $\text{SiOCH}_2\text{CH}_3$ , overlapped) ppm.  $^{13}\text{C}$  NMR (50.3 MHz,  $\text{CDCl}_3$ ):  $\delta$  6.2( $\text{SiCH}_2$ ), 18.0( $\text{SiOCH}_2\text{CH}_3$ ), 23.0( $\text{SiCH}_2\text{CH}_2\text{CH}_2$ ), 58.2( $\text{SiOCH}_2\text{CH}_3$ ), 68.8-70.3, overlapped (PEO's  $\text{OCH}_2$  and  $\text{SiCH}_2\text{CH}_2\text{CH}_2$ ) ppm.

Figure S1:  $^{29}\text{Si}$  NMR of DGS

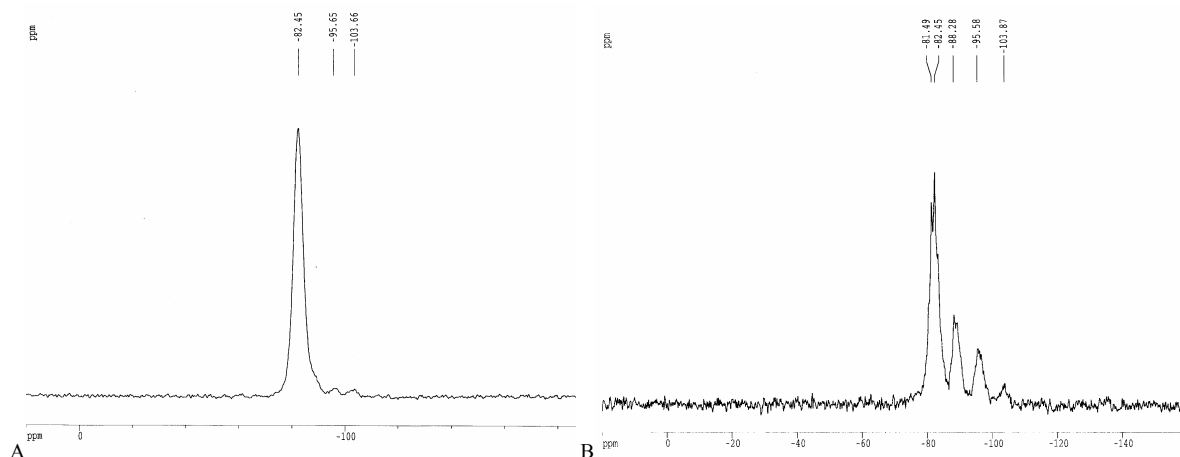

Figure S2:  $^{29}\text{Si}$  NMR spectra of DGS prepared from A) dry glycerol distilled from Mg, freshly distilled TEOS, B) a “fresh” bottle of glycerol.

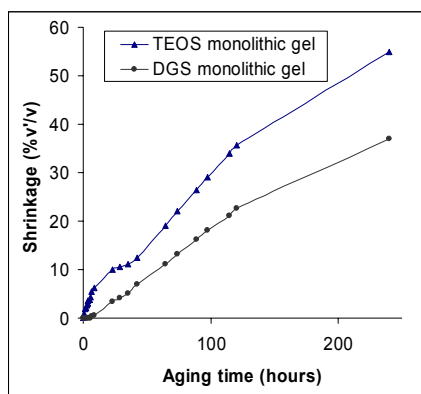

Figure S3: Comparison of rates of shrinkage for: A: TEOS (T-1) and DGS (D-1), over 10 days

Supplementary material (ESI) for Journal of Materials Chemistry  
 This journal is © The Royal Society of Chemistry 2004

**Table S1:** Relationship between Glycerol Concentration and Gelation Time for **DGS** (Table 3A).

| Entry                                      | 1       | 2       | 3       | 4       | 5       |
|--------------------------------------------|---------|---------|---------|---------|---------|
| H <sub>2</sub> O                           | 300 μL  |
| Glycerol                                   | 0 g     | 0.046 g | 0.092 g | 0.138 g | 0.184 g |
| <b>DGS</b>                                 | 0.212 g |
| <b>DGS</b> :additional glycerol mole ratio | 1:0     | 1:0.5   | 1:1     | 1:1.5   | 1:2     |
| Added glycerol concentration               | 0 M     | 1.7 M   | 3.3 M   | 5 M     | 6.7 M   |
| Total glycerol concentration               | 6.7 M   | 8.4 M   | 10.0 M  | 11.7 M  | 13.4 M  |
| Gel time (min)                             | 40      | 75      | 90      | 100     | 100     |

**Table S2:** Relation between Gel Time and Added Alcohols for TEOS-derived Silicas (Table 3B)

| Net Molarity of alcohol groups | Molarity of OH | [EtOH] (mono-ol) | Gel time (h) | [HOCH <sub>2</sub> CH <sub>2</sub> OH] (di-ol) | Gel time (h) | [glycerol] (tri-ol) | Gel time (h) |
|--------------------------------|----------------|------------------|--------------|------------------------------------------------|--------------|---------------------|--------------|
| 0.63 M                         | 0.63 M         |                  | 12.5         |                                                |              | 0.21 M              | 13.5         |
| 0.84 M                         |                |                  |              | 0.42 M                                         | 13           |                     |              |
| 1.3 M                          | 1.3 M          |                  | 12           |                                                |              | 0.42 M              | 15           |
| 1.68 M                         |                |                  |              | 0.84 M                                         | 17           |                     |              |
| 1.9 M                          | 1.9 M          |                  | 11           |                                                |              | 0.63 M              | 19           |
| 2.5 M                          | 2.5 M          |                  | 9.5          |                                                |              | 0.84 M              | 19           |
| 2.6 M                          |                |                  |              | 1.3 M                                          | 17           |                     |              |
| 3.8 M                          | 3.8 M          |                  | 5            |                                                |              | 1.3 M               | 21.5         |
| 5.0 M                          | 5.0 M          |                  | 3.5          | 2.5 M                                          | 20.5         | 1.7 M               | 22.5         |
| 6.6 M                          |                |                  |              | 3.3 M                                          | 22.5         |                     |              |

**POROSITY**

Table S3: Pore size and surface area data for monolithic silicas

| Experiment Number                        |                                               | <b>T-1</b>           | <b>D-1</b>           | <b>D-2</b>           |
|------------------------------------------|-----------------------------------------------|----------------------|----------------------|----------------------|
| Precursor                                |                                               | TEOS                 | <b>DGS</b>           | <b>DGS/HSA</b>       |
| Surface Area Data<br>(m <sup>2</sup> /g) | Single point BET area                         | 830                  | 618                  | 581                  |
|                                          | Multi-point BET area                          | 873                  | 635                  | 596                  |
|                                          | Langmuir surface area                         | 1721                 | 1579                 | 1668                 |
|                                          | Micro pore area                               | 781                  | 527                  | 473                  |
|                                          | Meso pore area                                | 91.8                 | 108                  | 124                  |
|                                          | Cumulative adsorption surface area            | 494                  | 534                  | 593                  |
|                                          | Cumulative desorption surface area            | 481                  | 529                  | 586                  |
| Pore Volume Data<br>(cm <sup>3</sup> /g) | Total pore volume                             | 0.565<br>(< 50.0 nm) | 0.467<br>(< 50.9 nm) | 0.467<br>(< 56.2 nm) |
|                                          | Cumulative adsorption pore volume (r=30-1 nm) | 0.343                | 0.377                | 0.422                |
|                                          | Cumulative desorption pore volume (r=30-1 nm) | 0.350                | 0.387                | 0.430                |
|                                          | Micro pore volume                             | 0.449                | 0.357                | 0.342                |
| Pore Size Data<br>(nm)                   | Average pore radius                           | 1.29                 | 1.47                 | 1.56                 |

Supplementary material (ESI) for Journal of Materials Chemistry  
 This journal is © The Royal Society of Chemistry 2004

Table S4: Pore size and surface area data for monolithic silicas with salt and protein dopants

| Experiment Number                        |                                               | D-1                  | D-6                  | D-2                  | D-7                    |
|------------------------------------------|-----------------------------------------------|----------------------|----------------------|----------------------|------------------------|
| Additives                                |                                               | -                    | MgCl <sub>2</sub>    | HSA                  | MgCl <sub>2</sub> /HSA |
| Surface Area Data<br>(m <sup>2</sup> /g) | Single point BET area                         | 581                  | 644                  | 618                  | 689                    |
|                                          | Multi-point BET area                          | 596                  | 661                  | 635                  | 707                    |
|                                          | Langmuir surface area                         | 1668                 | 3103                 | 1579                 | 2812                   |
|                                          | Micro pore area                               | 473                  | 22.1                 | 527                  | 94.9                   |
|                                          | Meso pore area                                | 124                  | 639                  | 108                  | 612                    |
|                                          | Cumulative adsorption surface area            | 593                  | 697                  | 534                  | 652                    |
|                                          | Cumulative desorption surface area            | 586                  | 794                  | 529                  | 754                    |
| Pore Volume Data<br>(cm <sup>3</sup> /g) | Total pore volume                             | 0.467<br>(< 56.2 nm) | 0.736<br>(< 53.9 nm) | 0.467<br>(< 50.9 nm) | 0.716<br>(< 45.6 nm)   |
|                                          | Cumulative adsorption pore volume (r=30-1 nm) | 0.422                | 0.705                | 0.377                | 0.647                  |
|                                          | Cumulative desorption pore volume (r=30-1 nm) | 0.430                | 0.749                | 0.387                | 0.691                  |
|                                          | Micro pore volume                             | 0.342                | 0.0677               | 0.357                | 0.103                  |
| Pore Size Data (nm)                      | Average pore radius                           | 1.56                 | 2.27                 | 1.47                 | 2.03                   |

Supplementary material (ESI) for Journal of Materials Chemistry  
 This journal is © The Royal Society of Chemistry 2004

Table S5: Pore size and surface area data for monolithic silicas with protein dopants

| Experiment Number                        |                       | D-3         | D-4       | D-5       |
|------------------------------------------|-----------------------|-------------|-----------|-----------|
| HSA concentration (mM)                   |                       | 0           | 0.5       | 1         |
| Surface Area Data<br>(m <sup>2</sup> /g) | Single point BET area | 535         | 444       | 450       |
|                                          | Multi-point BET area  | 555         | 458       | 468       |
|                                          | Langmuir surface area | 5732        | 4960      | 5142      |
| Pore Volume Data<br>(cm <sup>3</sup> /g) | Total pore volume     | 0.965       | 0.787     | 0.838     |
|                                          |                       | (< 53.7 nm) | (<53.0nm) | (<53.9nm) |
| Pore Size Data (nm)                      | Average pore radius   | 3.48        | 3.43      | 3.58      |

Supplementary material (ESI) for Journal of Materials Chemistry  
 This journal is © The Royal Society of Chemistry 2004

Table S4: Pore size and surface area data for monolithic silicas with PEO dopants

| No                                       |                                               | D-1                  | D-8                | D-9                |
|------------------------------------------|-----------------------------------------------|----------------------|--------------------|--------------------|
| Precursor                                |                                               | DGS                  | PEO200             | PEO10K             |
| Surface Area Data<br>(m <sup>2</sup> /g) | Single point BET area                         | 581                  | 565                | 560                |
|                                          | Multi-point BET area                          | 596                  | 575                | 574                |
|                                          | Langmuir surface area                         | 1668                 | 1653               | 1915               |
|                                          | Micro pore area                               | 473                  | 418                | 268                |
|                                          | Meso pore area                                | 124                  | 157                | 305                |
|                                          | Cumulative adsorption surface area            | 593                  | 503                | 548                |
|                                          | Cumulative desorption surface area            | 586                  | 520                | 648                |
| Pore Volume Data<br>(cm <sup>3</sup> /g) | Total pore volume                             | 0.467<br>(< 56.2 nm) | 0.476<br>(<51.2nm) | 0.506<br>(<54.2nm) |
|                                          | Cumulative adsorption pore volume(r=30-1 nm)  | 0.422                | 0.399              | 0.459              |
|                                          | Cumulative desorption pore volume (r=30-1 nm) | 0.430                | 0.414              | 0.506              |
|                                          | Micro pore volume                             | 0.342                | 0.306              | 0.210              |
| Pore Size Data (nm)                      | Average pore radius                           | 1.56                 | 1.65               | 1.76               |

Supplementary material (ESI) for Journal of Materials Chemistry  
 This journal is © The Royal Society of Chemistry 2004

**Table S5: Pore size and surface area data for monolithic silicas with silylated PEO dopants**

| No                                       |                                               | <b>D-1</b>           | <b>D-10</b>        | <b>D-11</b>          |
|------------------------------------------|-----------------------------------------------|----------------------|--------------------|----------------------|
| Precursor                                |                                               | <b>DGS</b>           | PEO(Si)200         | PEO(Si)10K           |
| Surface Area Data<br>(m <sup>2</sup> /g) | Single point BET area                         | 581                  | 323                | 374                  |
|                                          | Multi-point BET area                          | 596                  | 331                | 390                  |
|                                          | Langmuir surface area                         | 1668                 | 1215               | 2365                 |
|                                          | Micro pore area                               | 473                  | 141                | -                    |
|                                          | Meso pore area                                | 124                  | 190                | 438                  |
|                                          | Cumulative adsorption surface area            | 593                  | 350                | 360                  |
|                                          | Cumulative desorption surface area            | 586                  | 387                | 409                  |
| Pore Volume Data<br>(cm <sup>3</sup> /g) | Total pore volume                             | 0.467<br>(< 56.2 nm) | 0.308<br>(<48.5nm) | 0.596<br>(< 58.0 nm) |
|                                          | Cumulative adsorption pore volume(r=30-1 nm)  | 0.422                | 0.295              | 0.557                |
|                                          | Cumulative desorption pore volume (r=30-1 nm) | 0.430                | 0.313              | 0.579                |
|                                          | Micro pore volume                             | 0.342                | 0.117              | -                    |
| Pore Size Data<br>(nm)                   | Average pore radius                           | 1.56                 | 1.87               | 3.06                 |
